# Supplementary material for: Selective hydroxylation of aryl iodides to produce phenols under mild conditions using a supported copper catalyst
Source: Royal Society of Chemistry journal article supplement (doi:10.1039/d1ra04112f), 2021-01-01
Supplement: d1ra04112f1.pdf [file d1ra04112f1.pdf]

## Supporting information

### **Selective hydroxylation of aryl iodides to produce phenols under mild conditions using a supported copper catalyst**

Leiduan Hao,<sup>a</sup> Anika Auni,<sup>a</sup> Guodong Ding,<sup>\*, a</sup> Xiaoyu Li,<sup>b</sup> Haiping Xu,<sup>c</sup> Tao Li,<sup>\*, c, d</sup> Qiang Zhang<sup>\*, a, b</sup>

<sup>\*</sup>[guodong.ding@wsu.edu](mailto:guodong.ding@wsu.edu); [tli4@niu.edu](mailto:tli4@niu.edu); [q.zhang@wsu.edu](mailto:q.zhang@wsu.edu)

<sup>a</sup> Department of Chemistry, <sup>b</sup> Materials Science and Engineering Program, Washington State University, Pullman, Washington 99164, United States

<sup>c</sup> Department of Chemistry and Biochemistry, Northern Illinois University, DeKalb, IL 60115, USA.

<sup>d</sup> X-ray Science Division, Argonne National Laboratory, Argonne, IL 60439, USA.

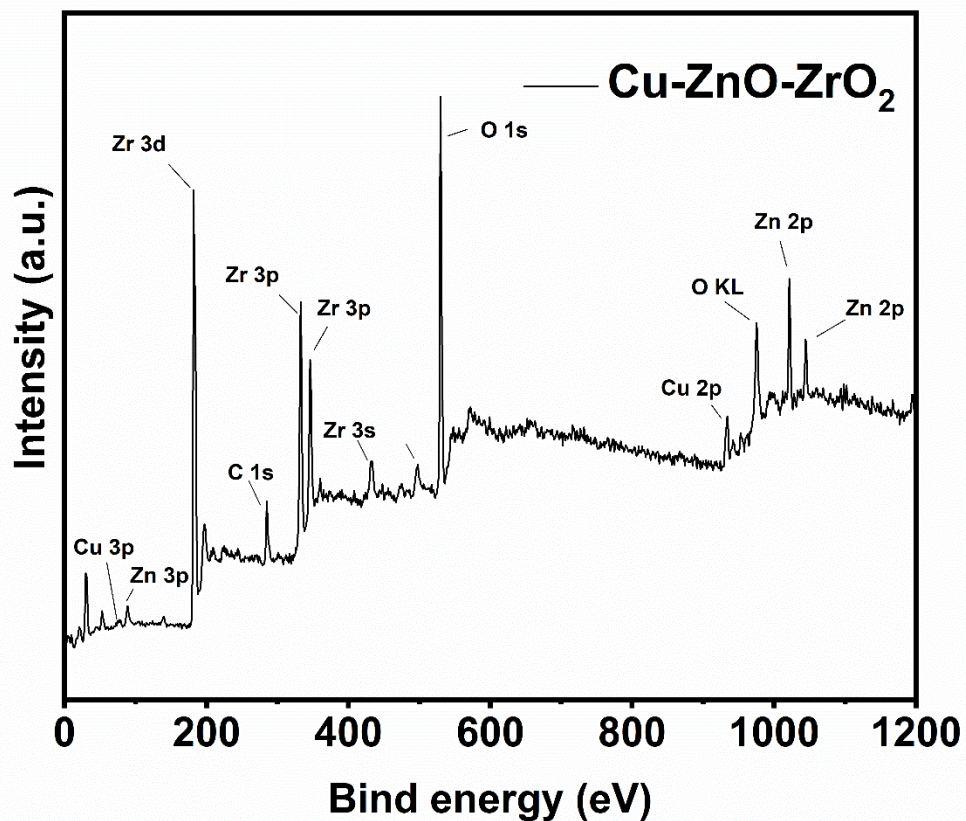

**Figure S1.** The full XPS spectrum of the catalyst Cu-ZnO-ZrO<sub>2</sub>.

**Figure S1** shows the full XPS spectrum of the catalyst Cu-ZnO-ZrO<sub>2</sub>. As indicated in Figure S1, the main elements on the surface of the sample are Cu, Zn, Zr and O. The photoelectron peaks of these elements appear at binding energies of 932.5 eV (Cu 2p), 1021.5 eV (Zn 2p), 182.1 eV (Zr 3d) and 532.0 eV (O 1s), respectively.

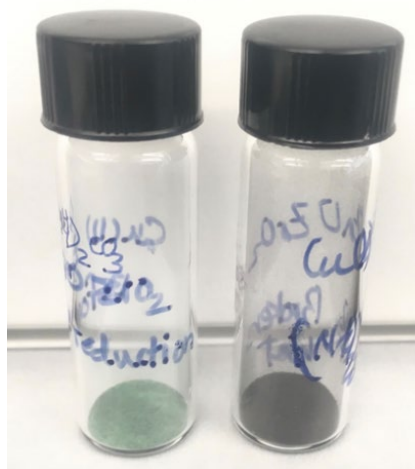

**Figure S2.** Color change of Cu-ZnO-ZrO<sub>2</sub>, before (left) and after the reduction (right).

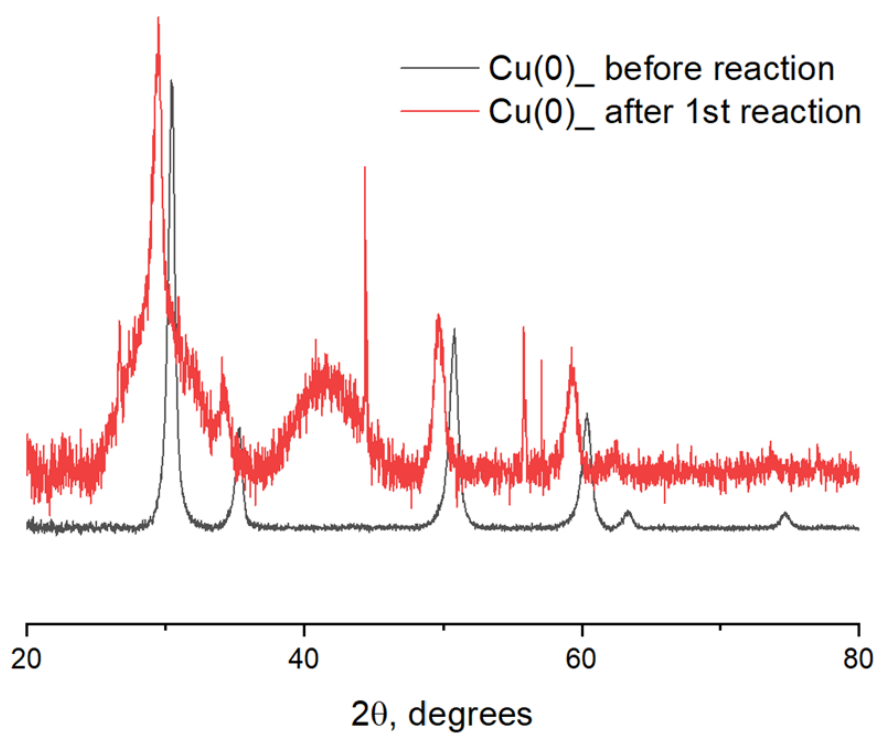

**Figure S3.** XRD patterns of the catalyst before and after the reaction.

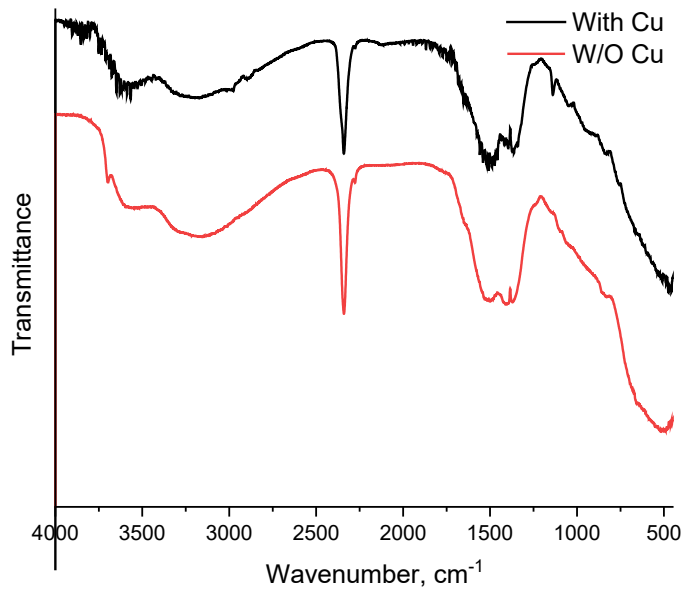

**Figure S4.** FTIR spectra of the support and catalyst.

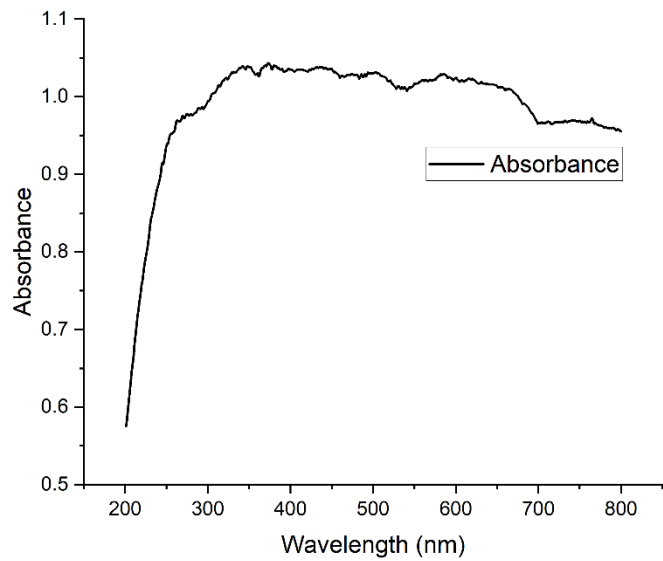

**Figure S5.** The UV-Vis absorption spectrum of the Cu-ZnO-ZrO<sub>2</sub>.

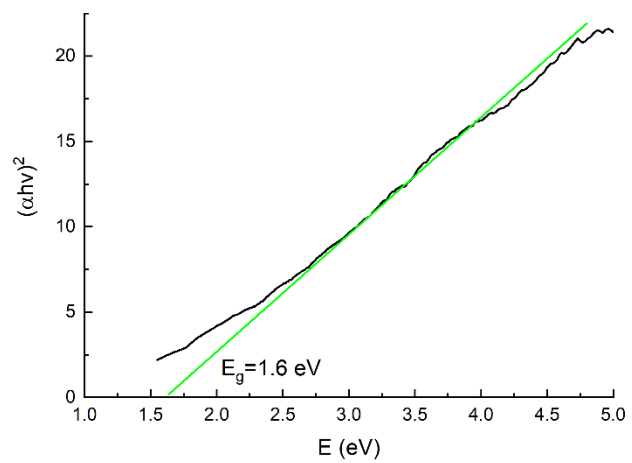

**Figure S6.** The Tauc plot showing the optical band gap of the Cu-ZnO-ZrO<sub>2</sub>.

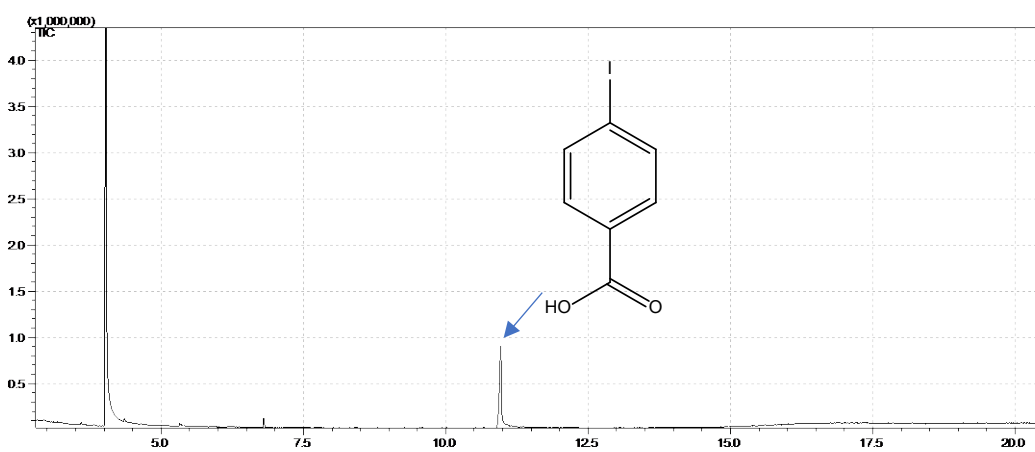

**Figure S7.** The GC-MS result of the reaction mixture started with 4-carboxylate-iodobenzene.

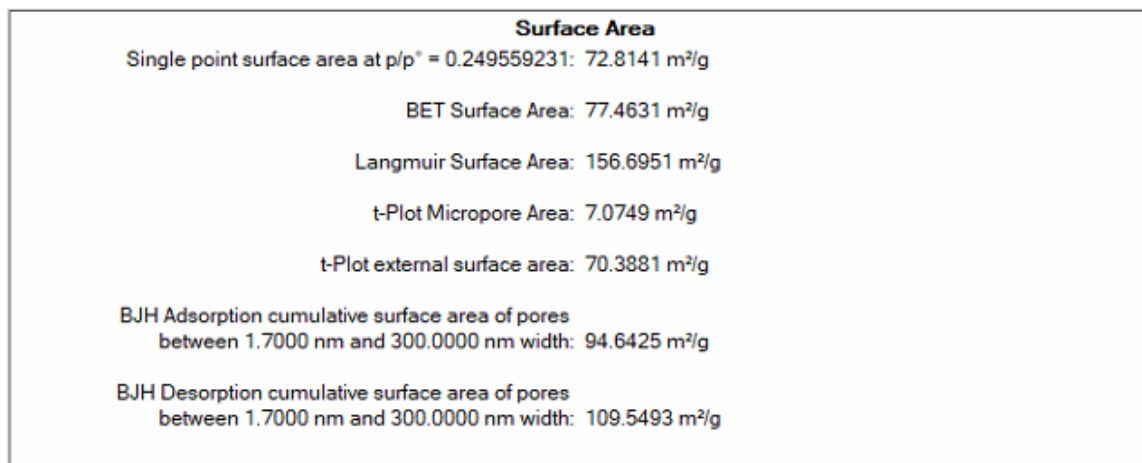

**Figure S8.** Surface area data for the catalyst.

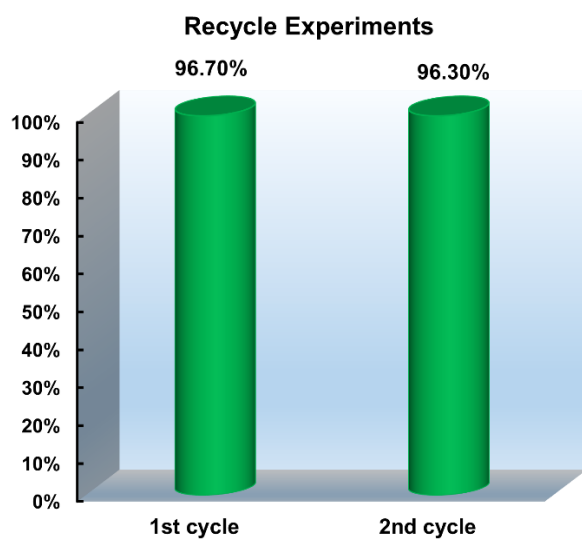

**Figure S9.** The recycling of the catalyst.

## IV. Copies of $^1\text{H}$ NMR and $^{13}\text{C}$ NMR Spectra

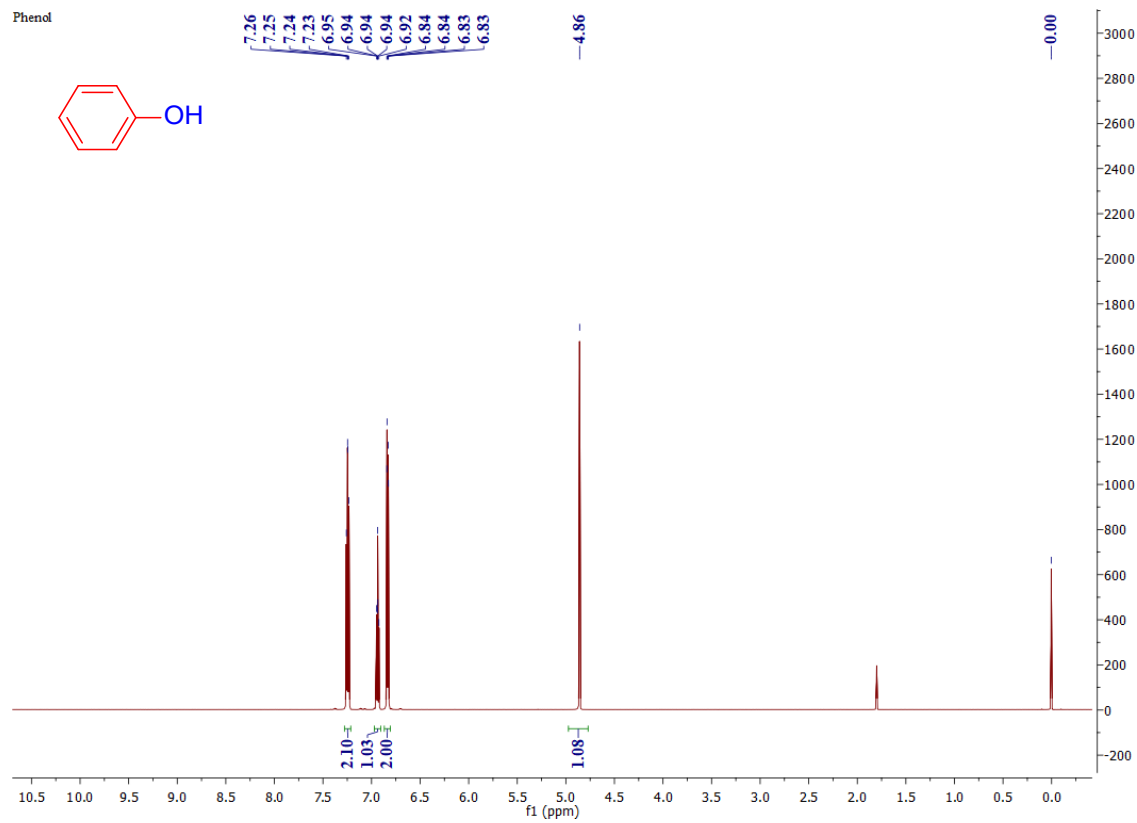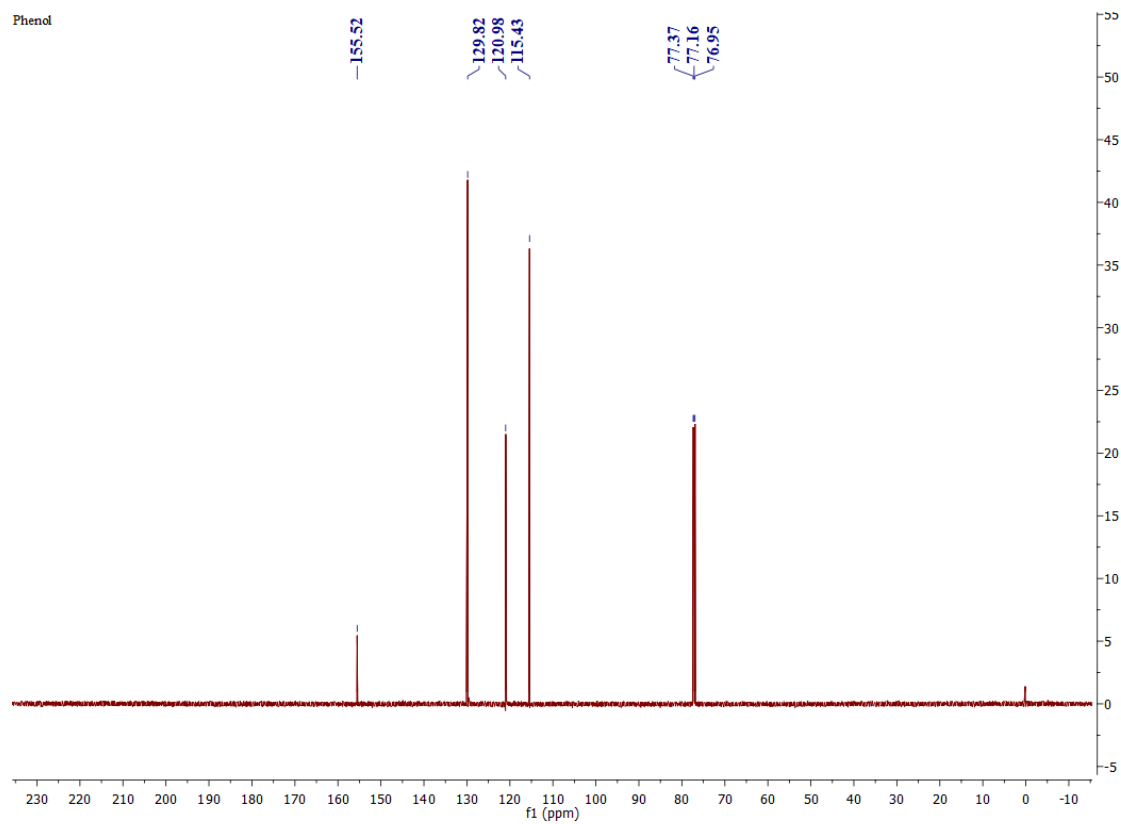

p-CH3

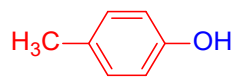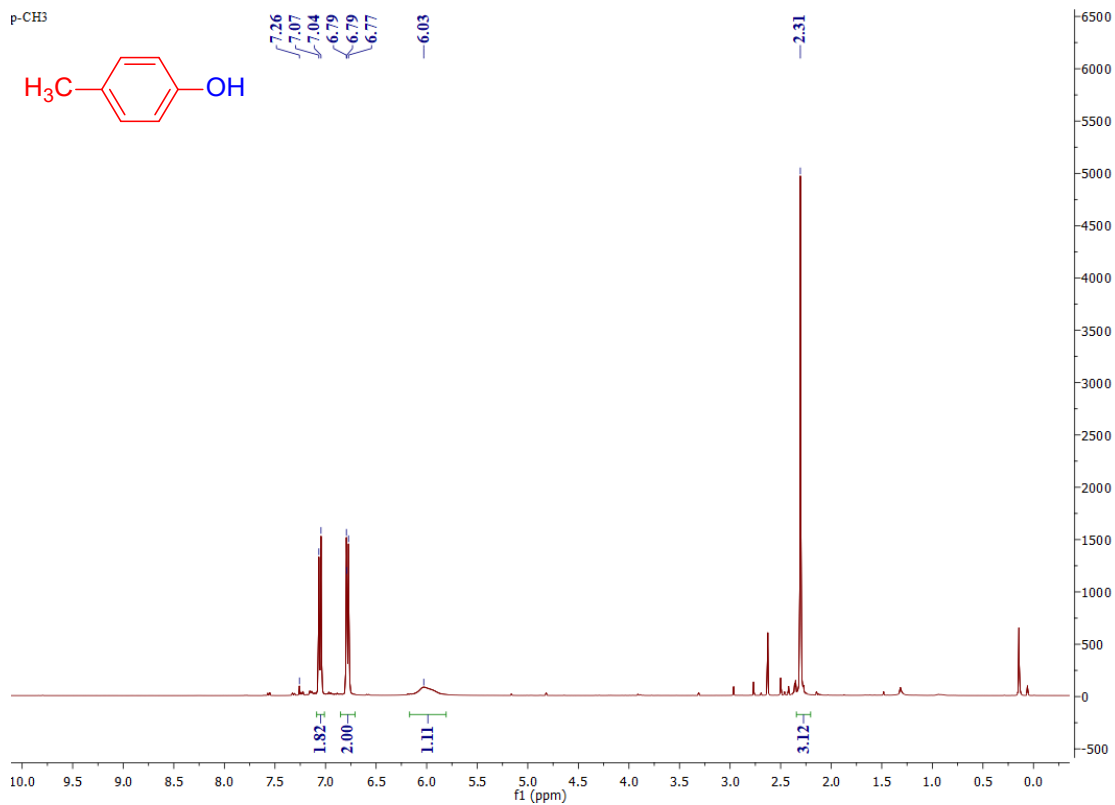

p-CH3. <sup>13</sup>C

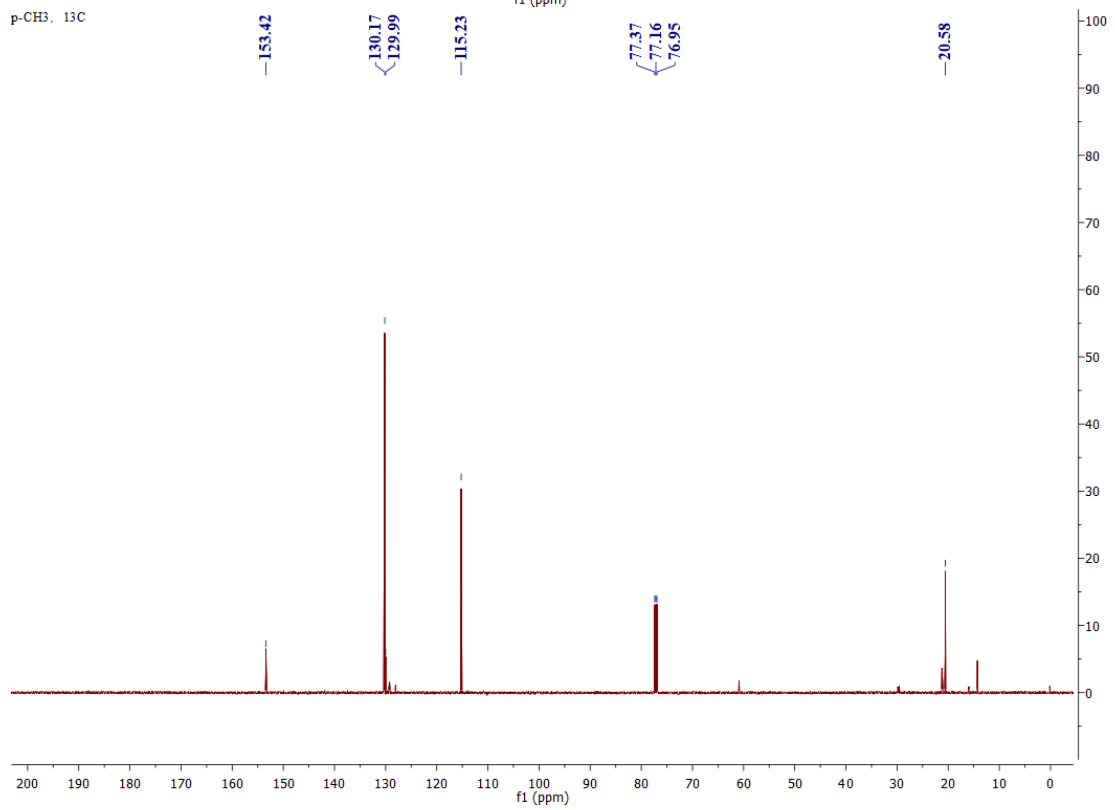



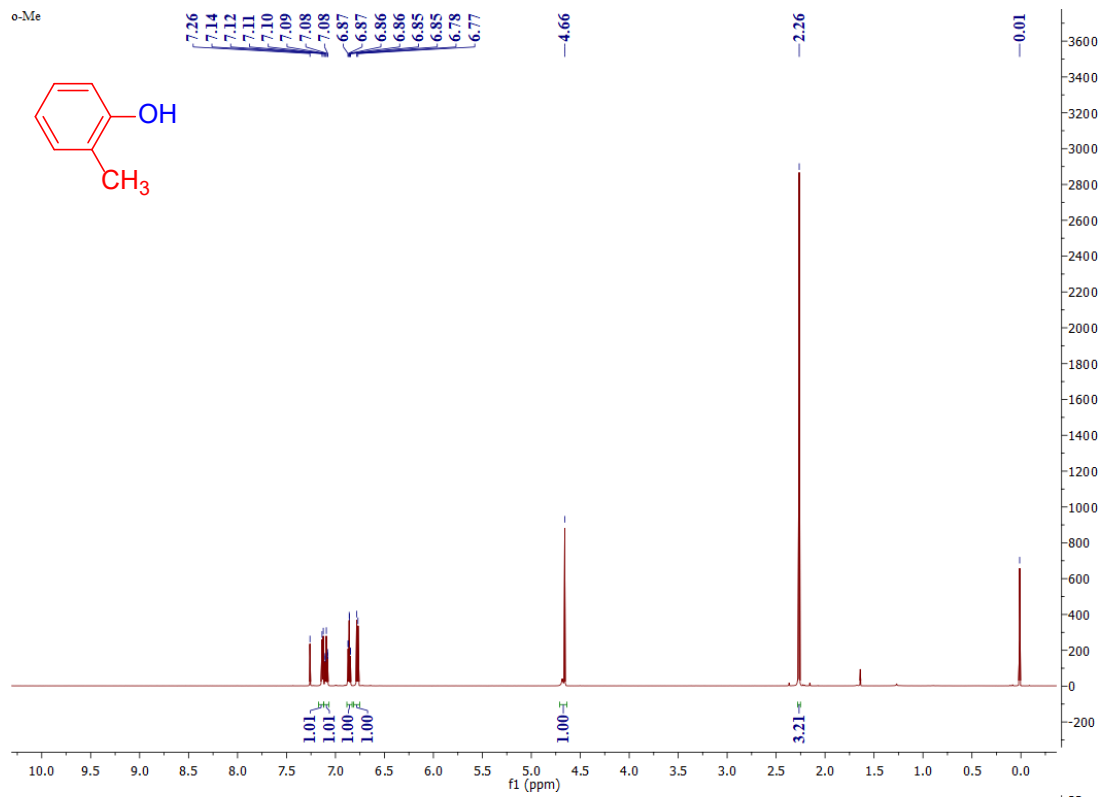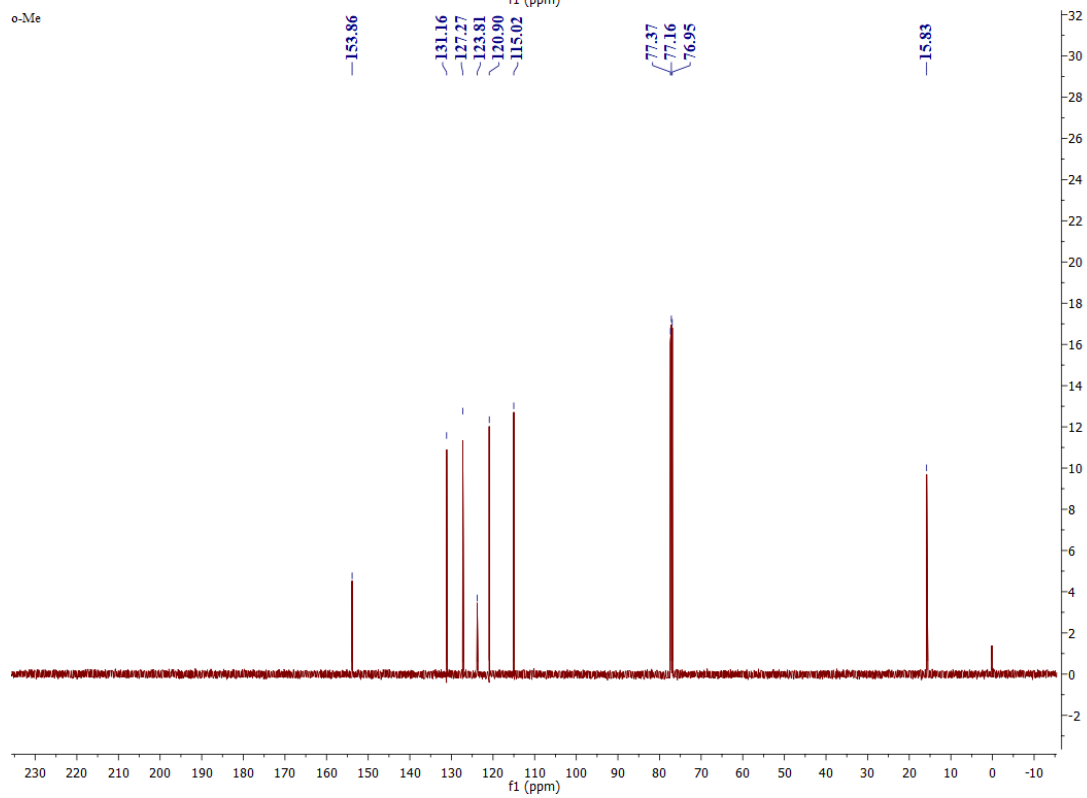

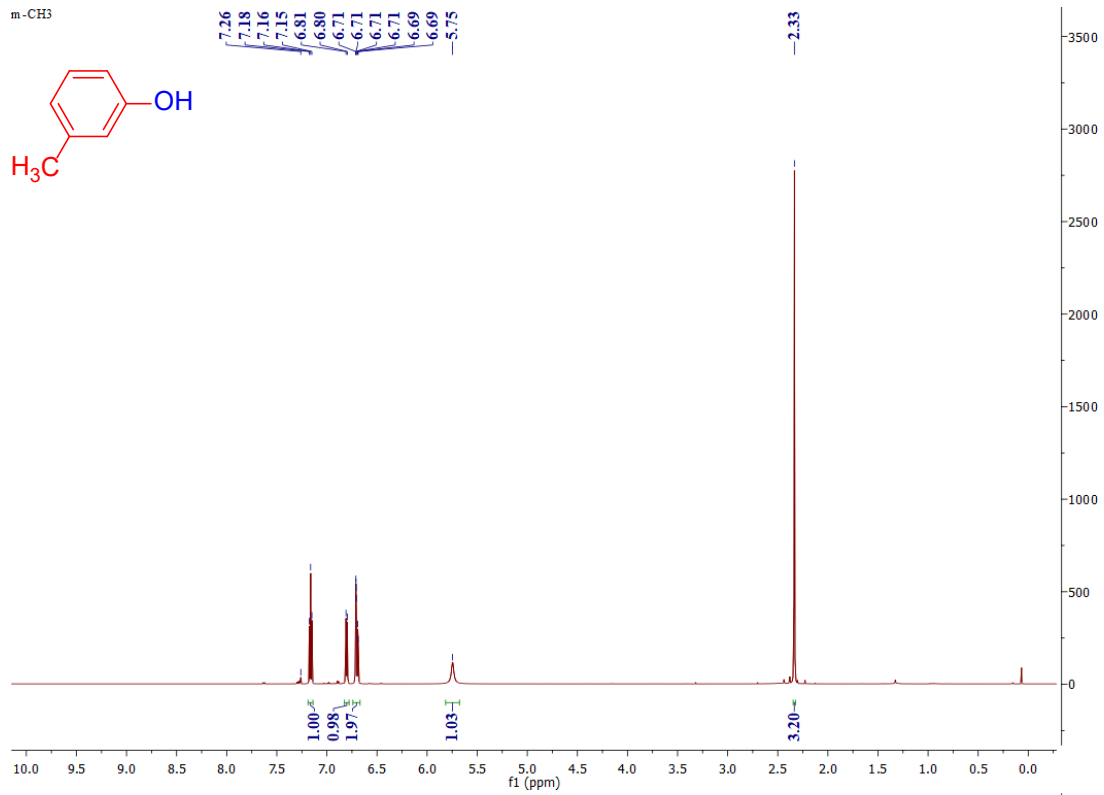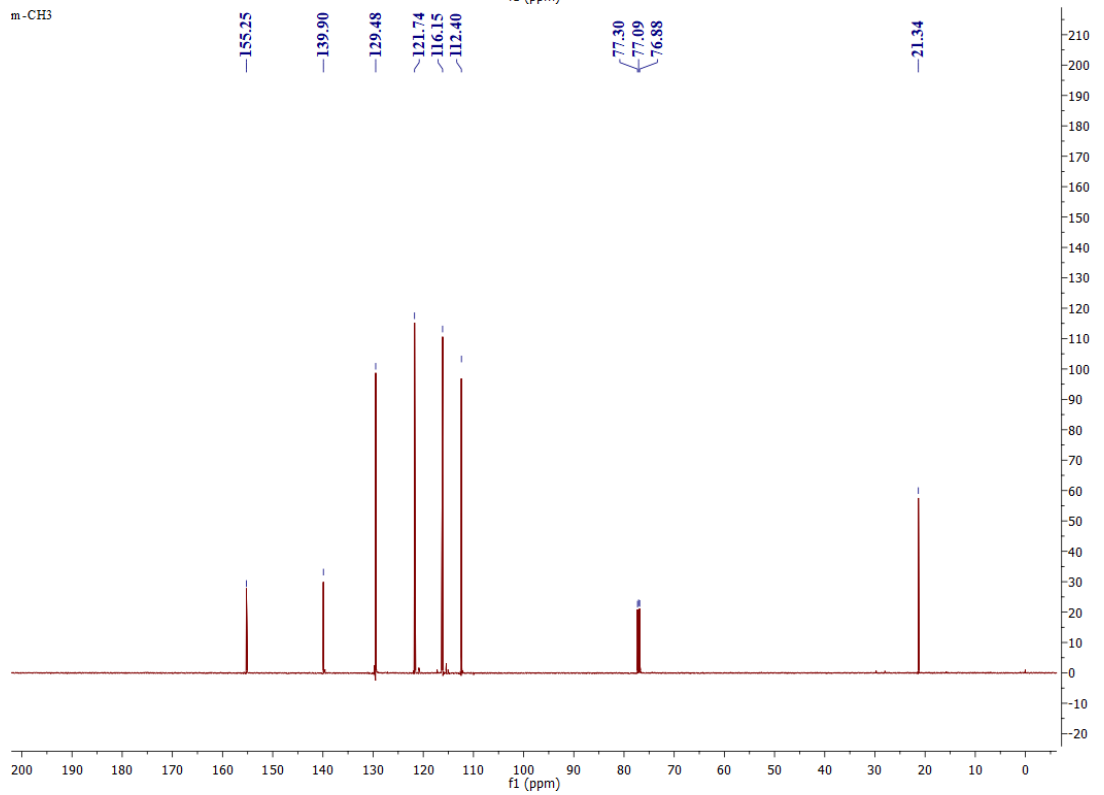

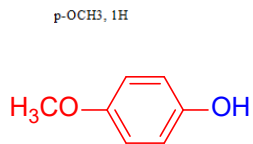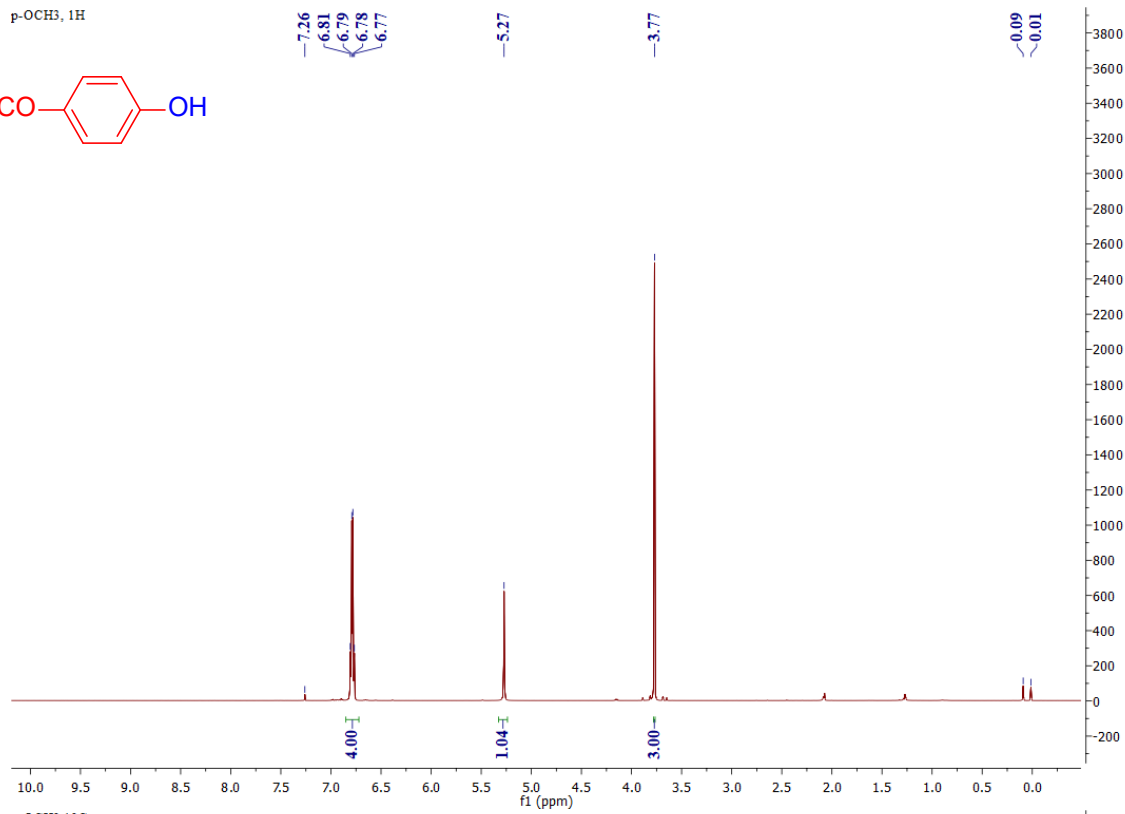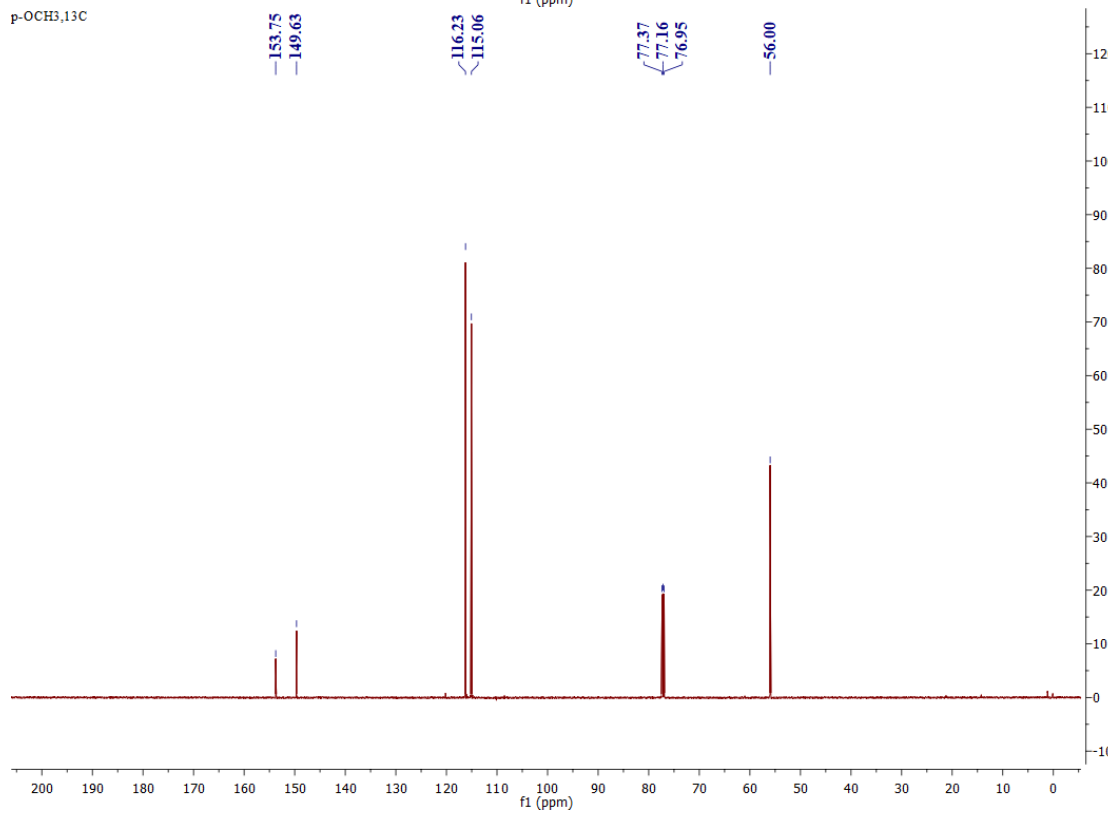

m-OCH3

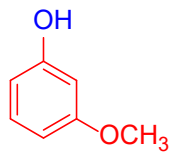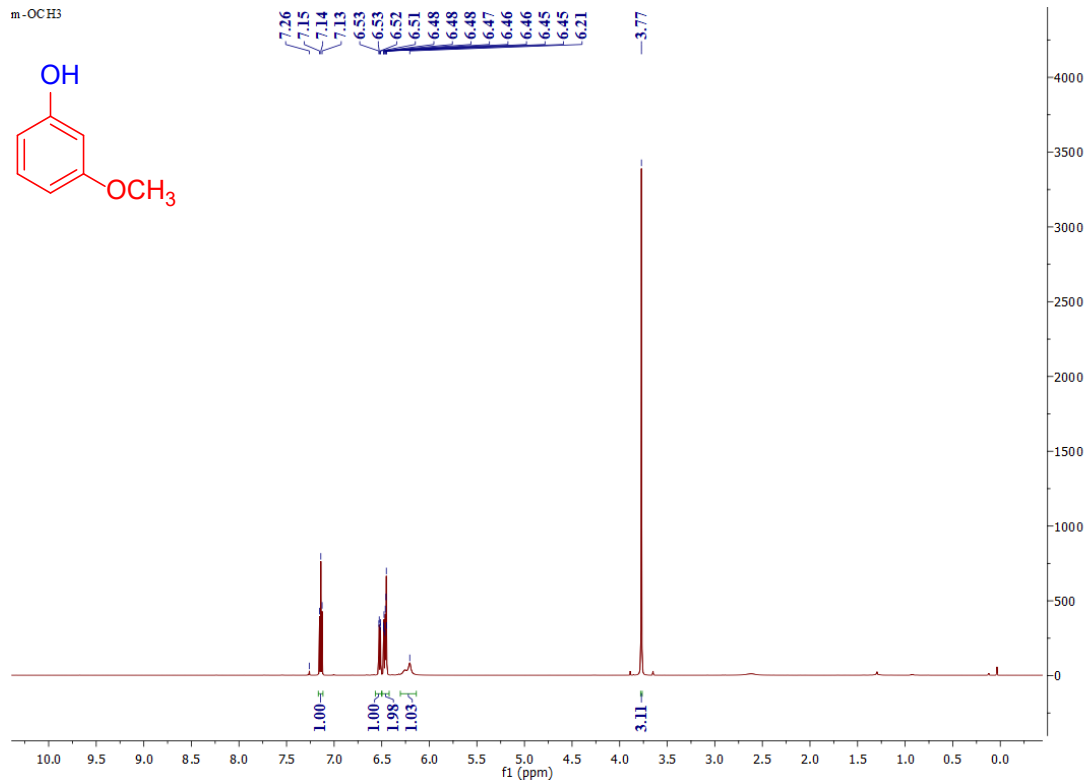

m-OCH3

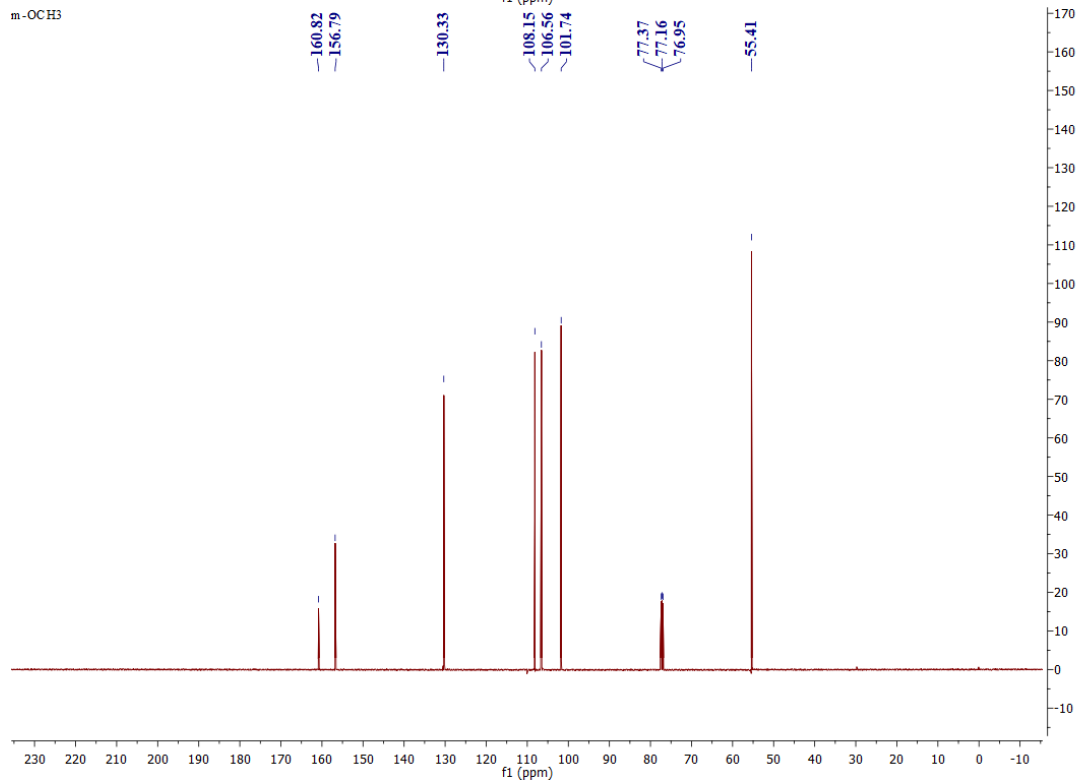

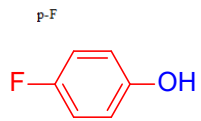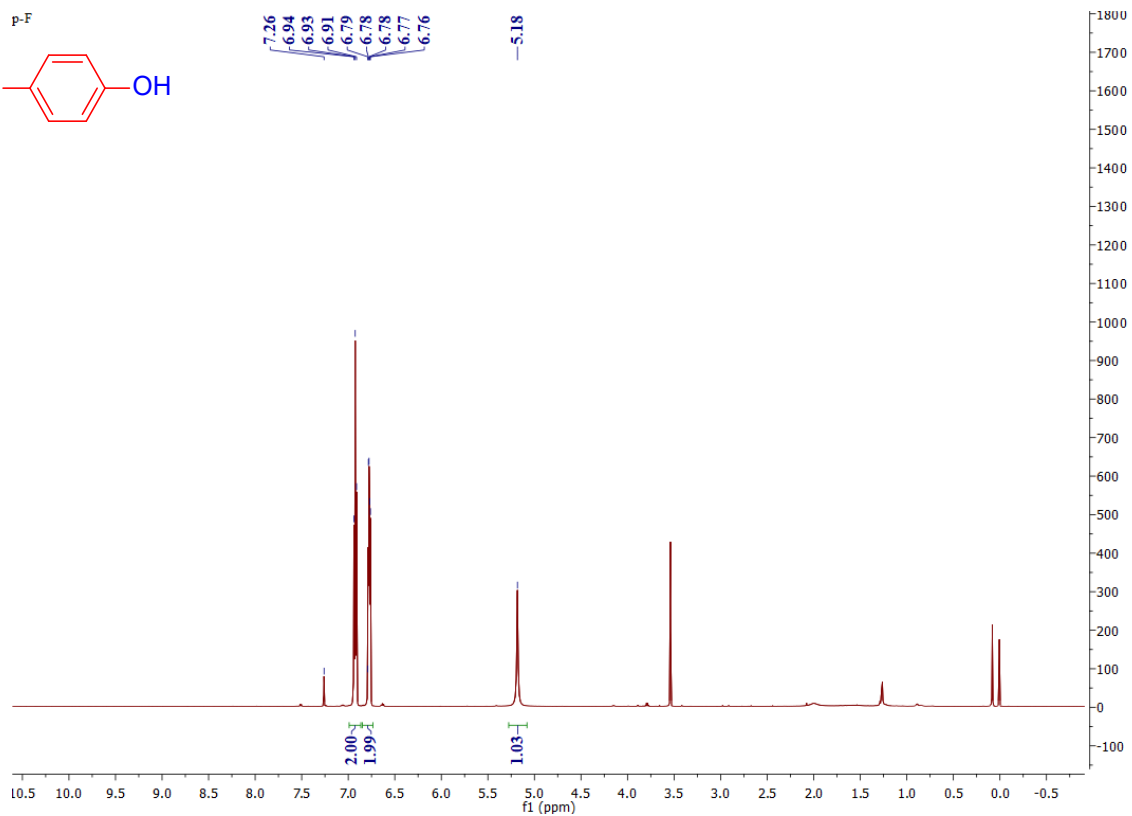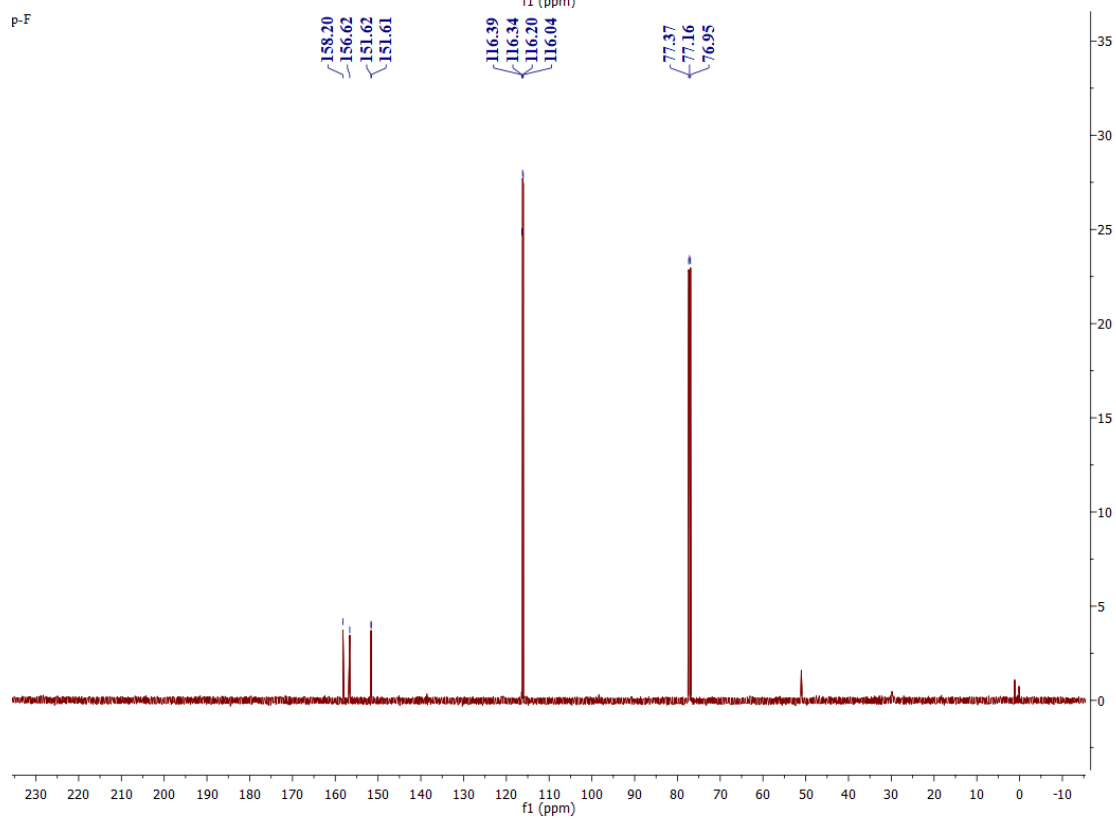

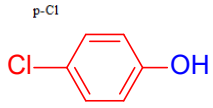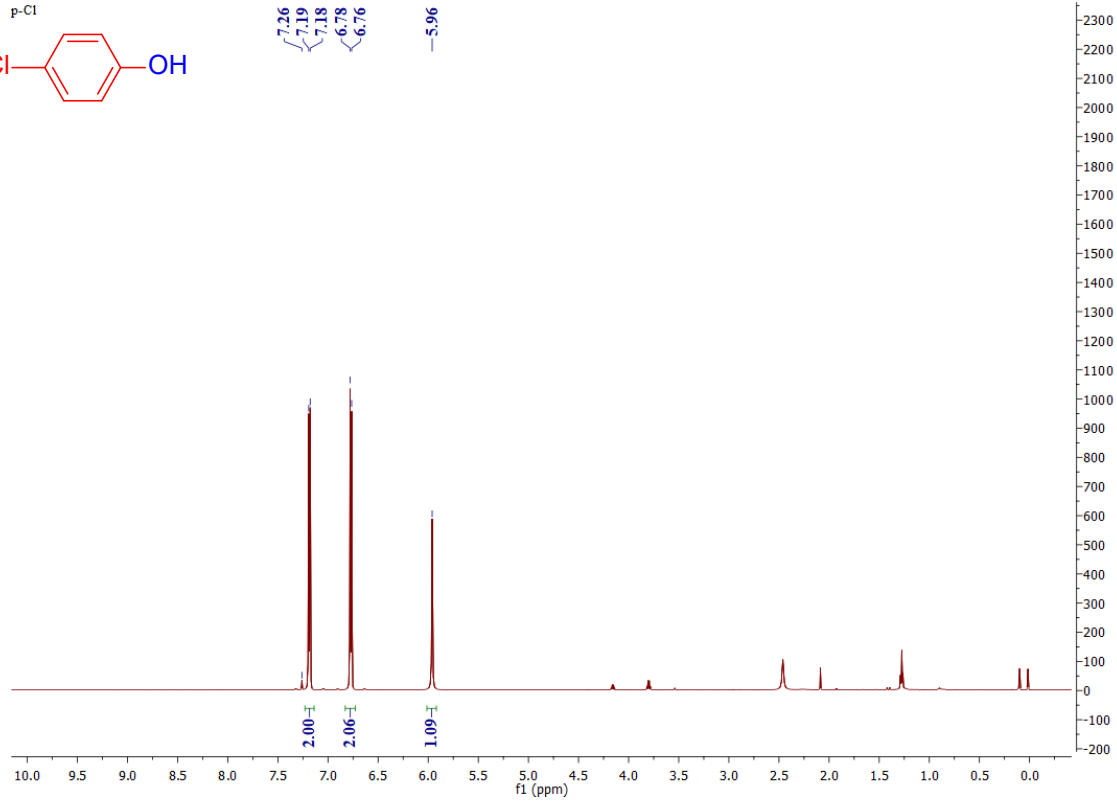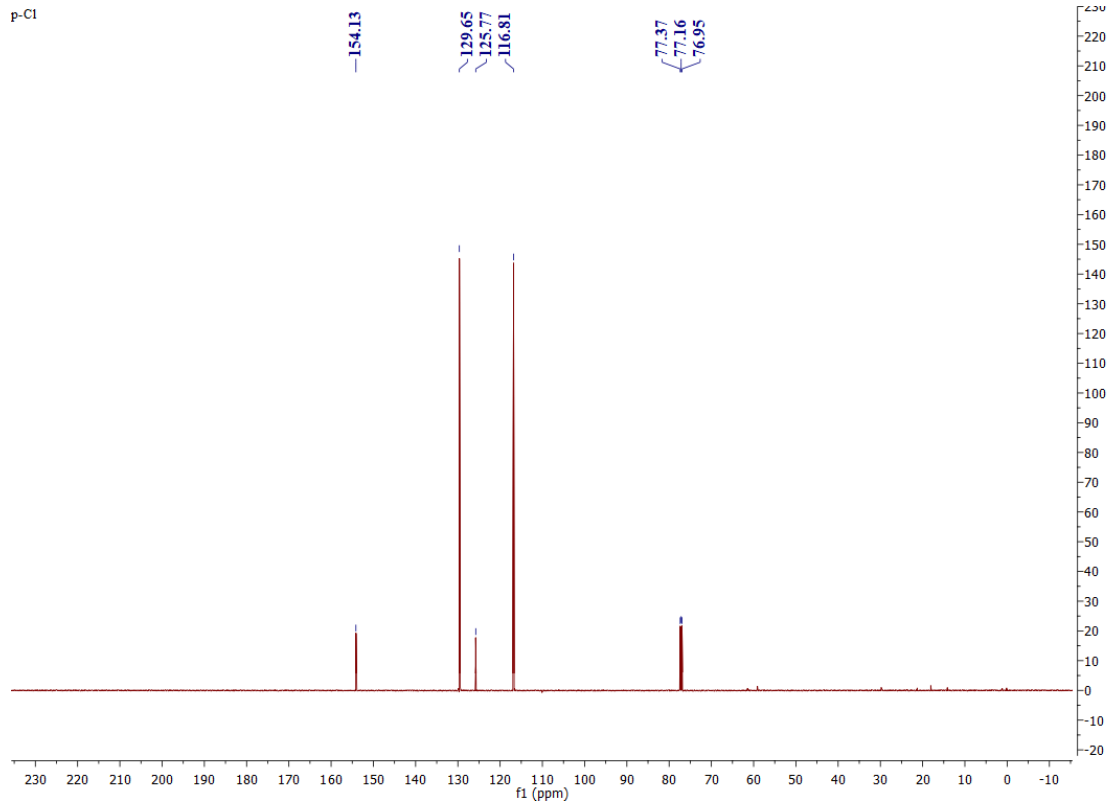

p-Br

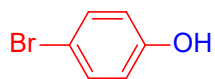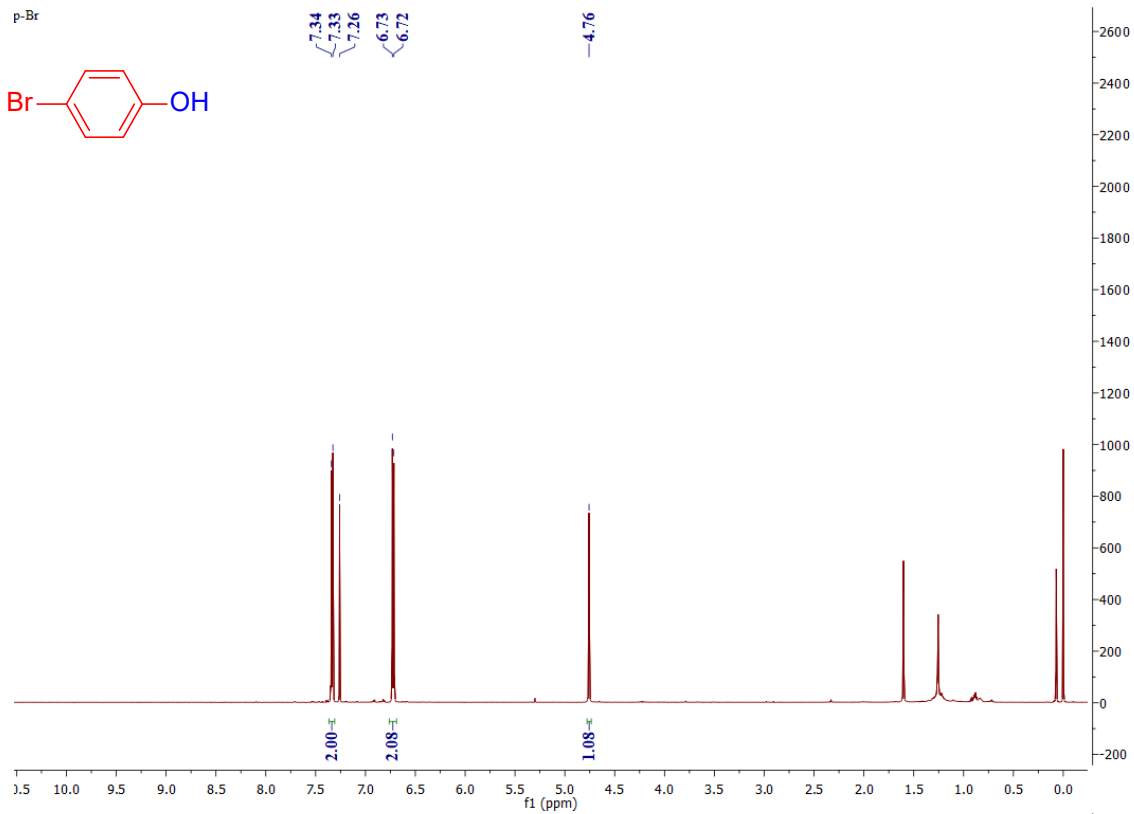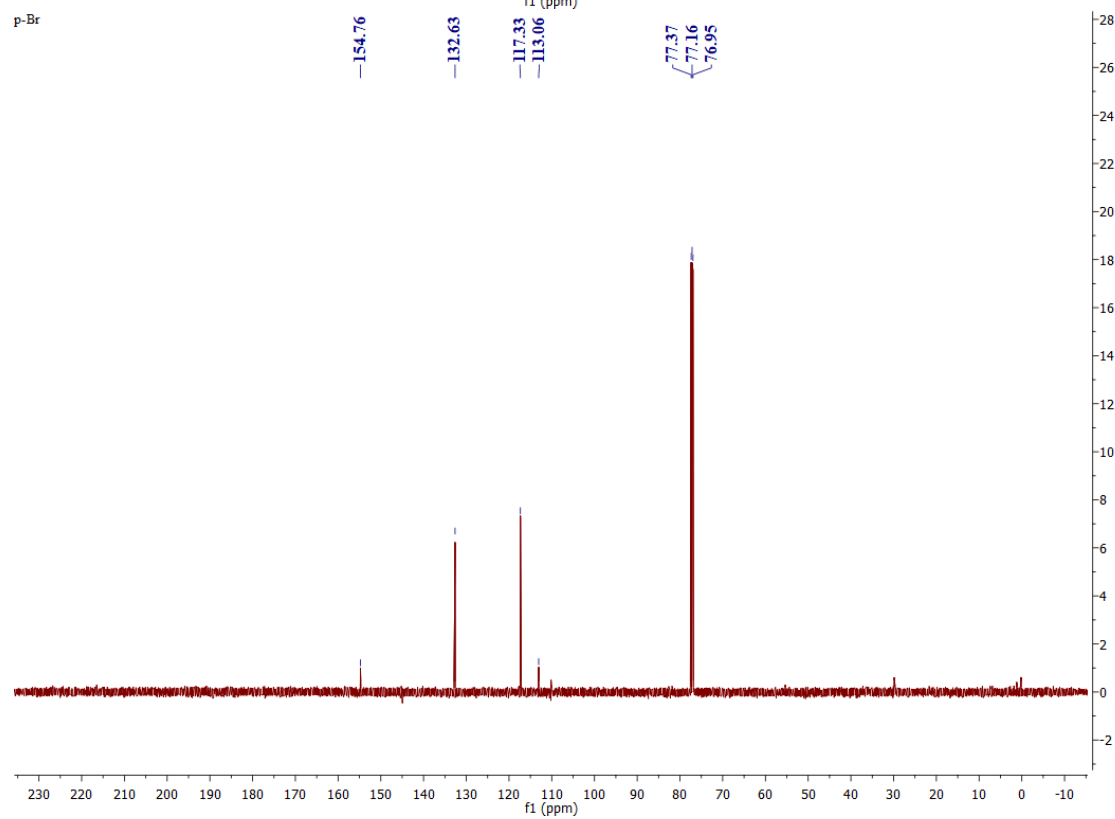

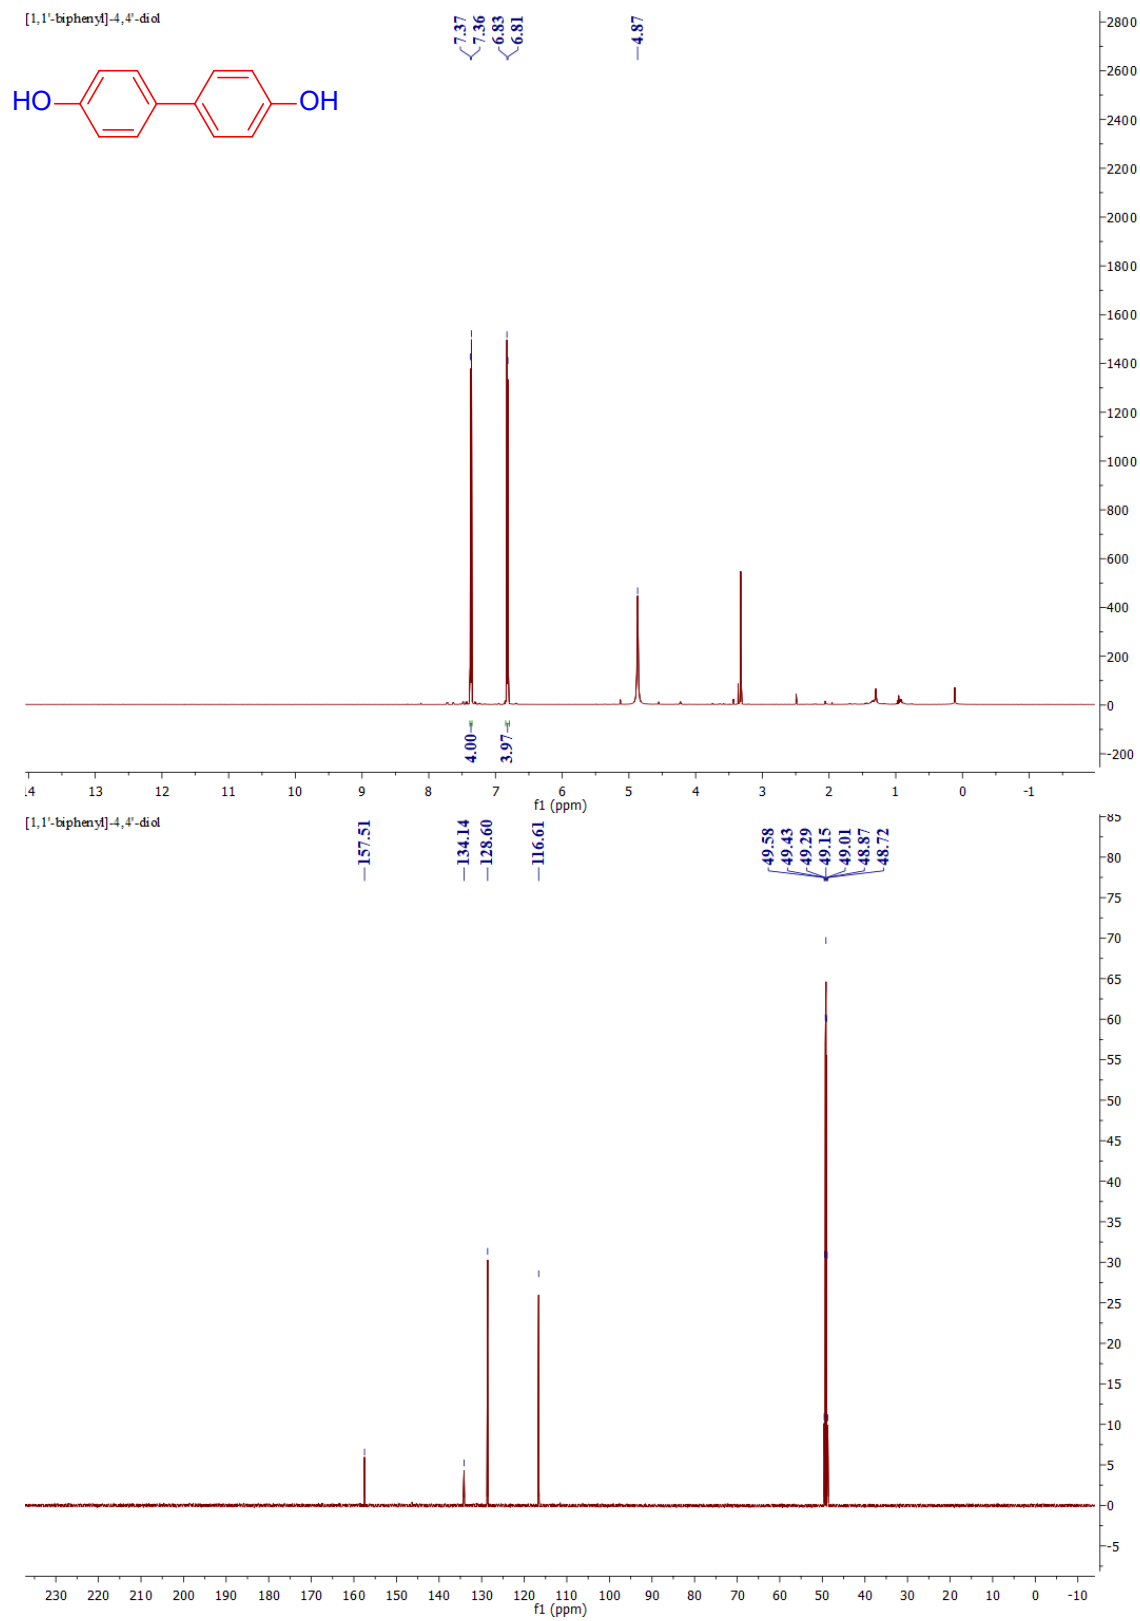



2,4,6-trimethylphenol

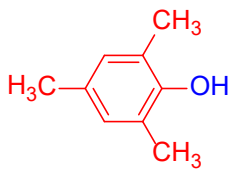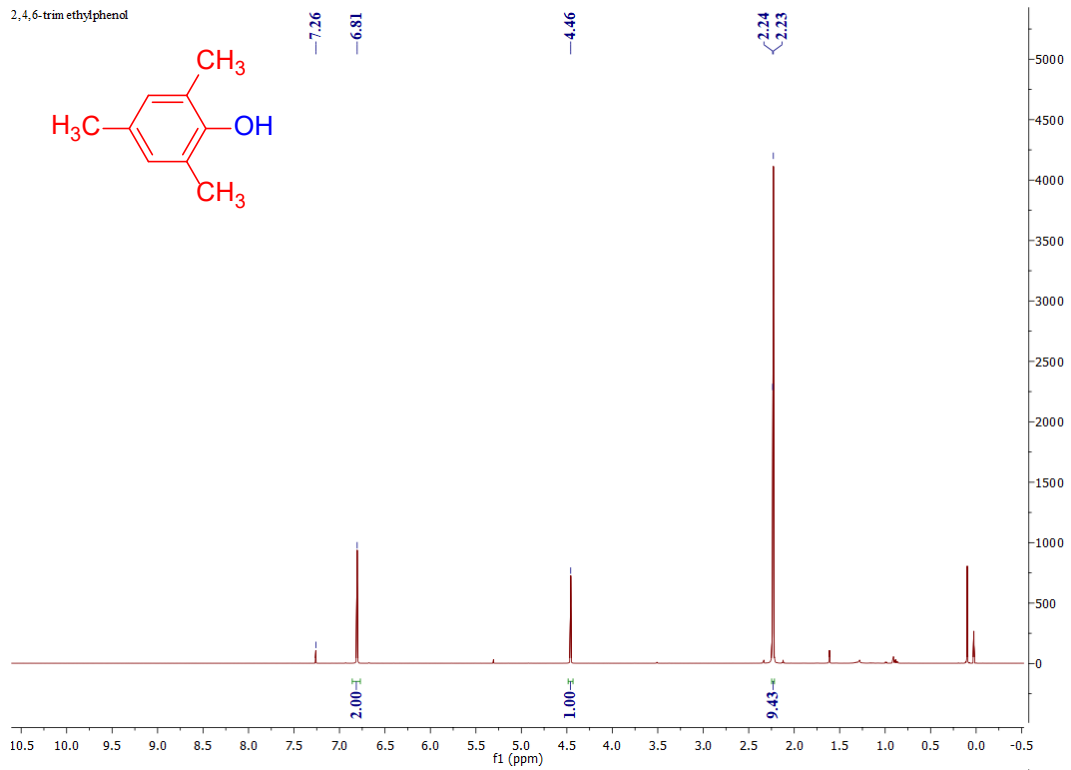

2,4,6-trimethylphenol

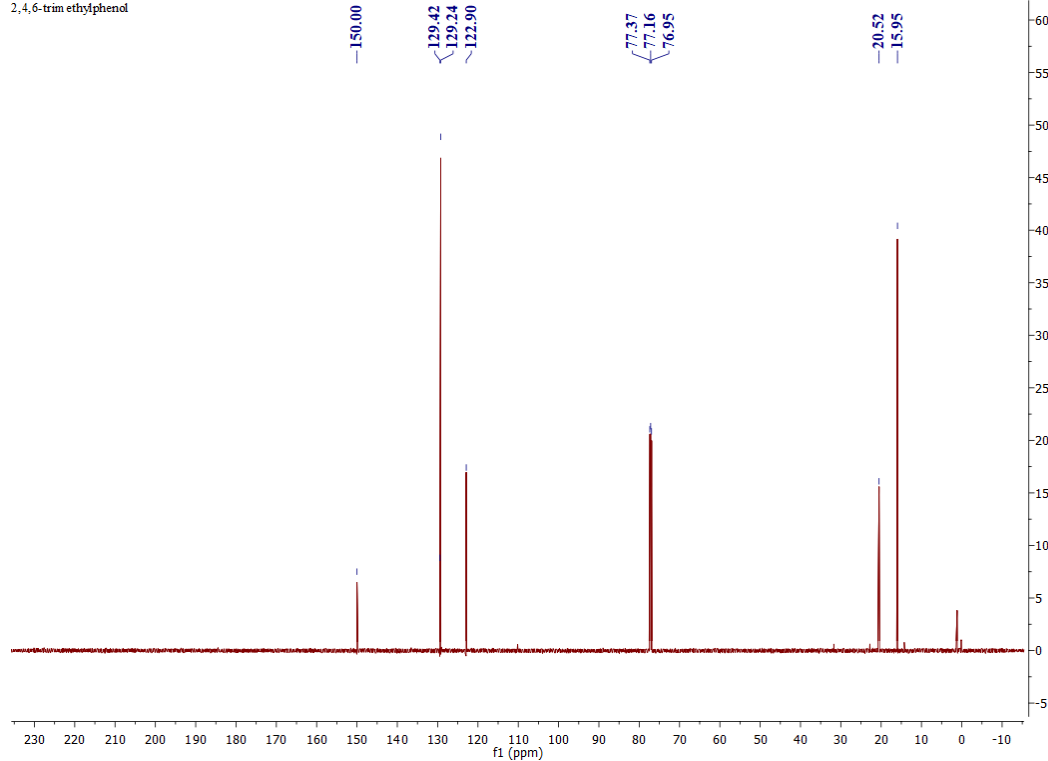

p-nitro

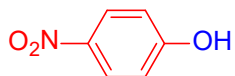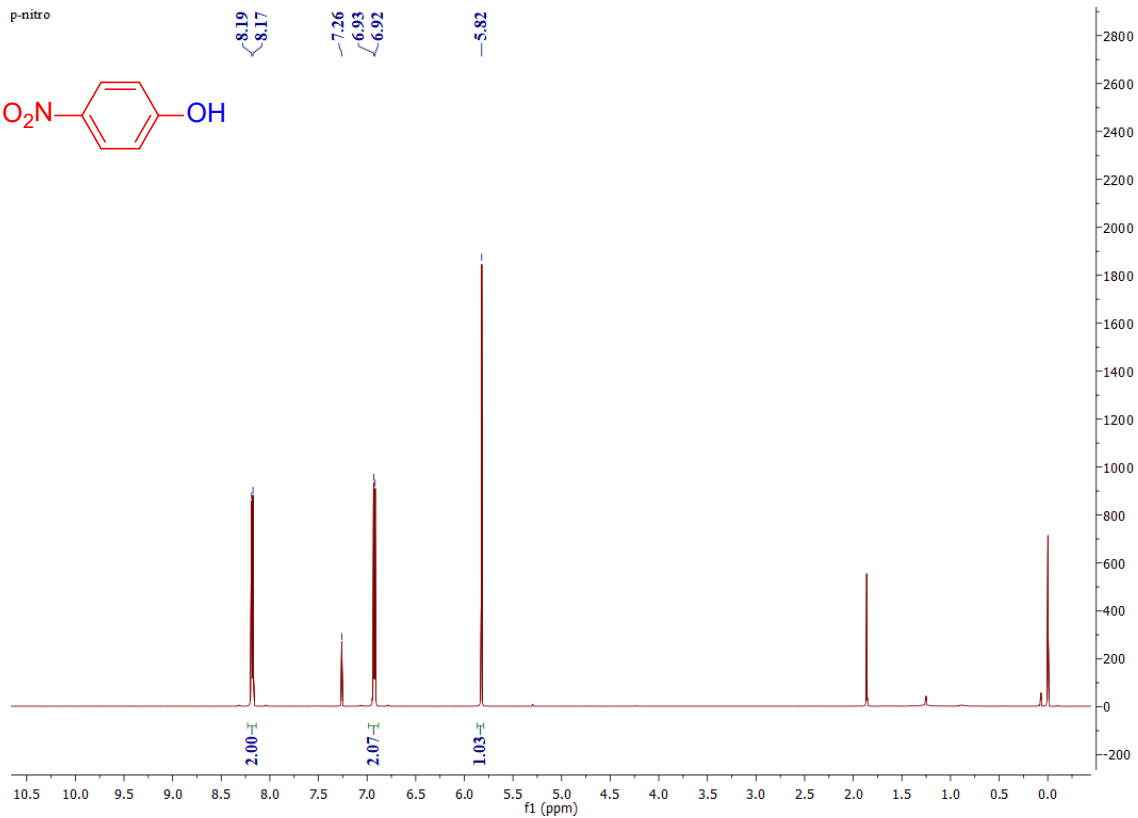

p-nitro

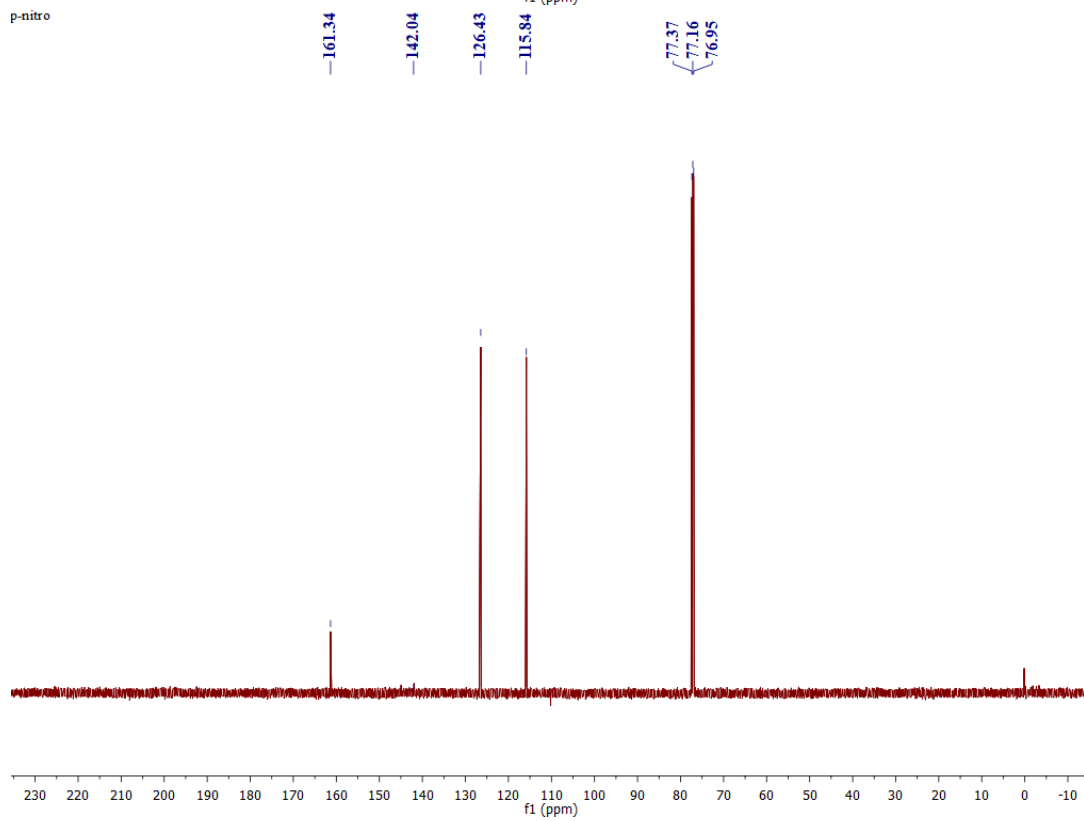

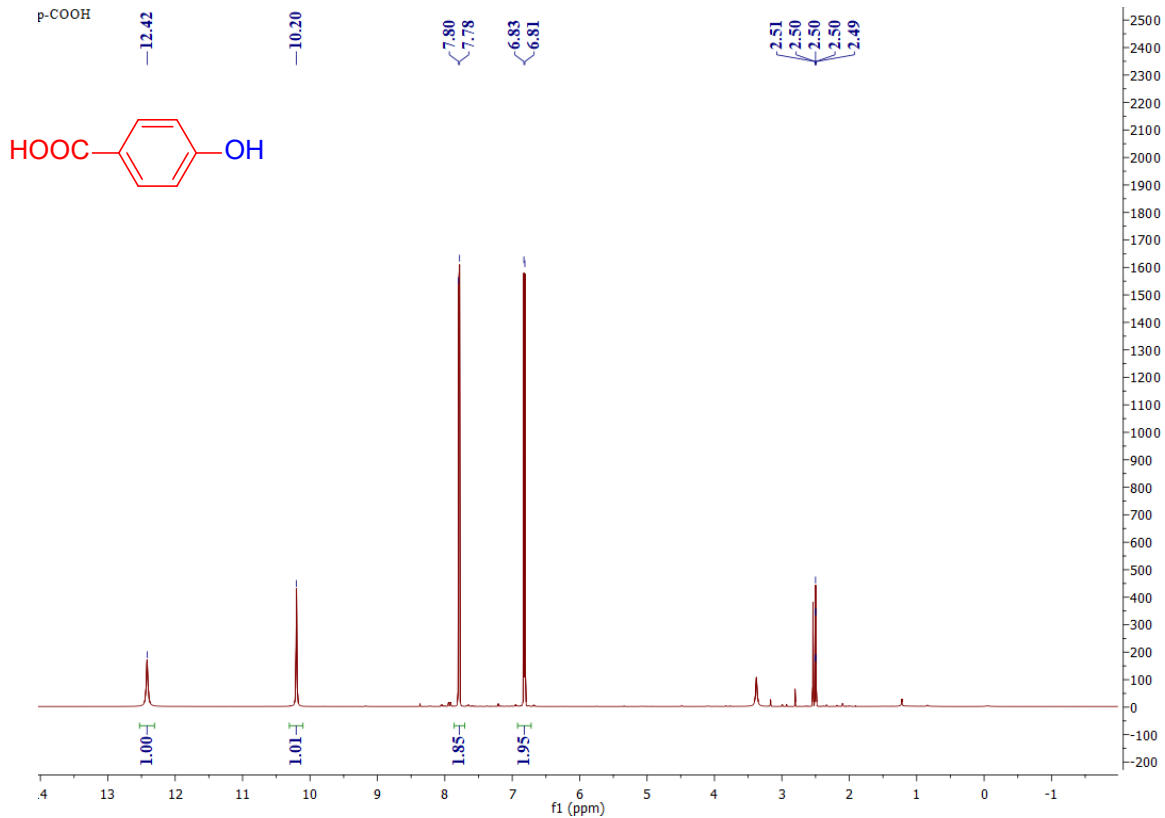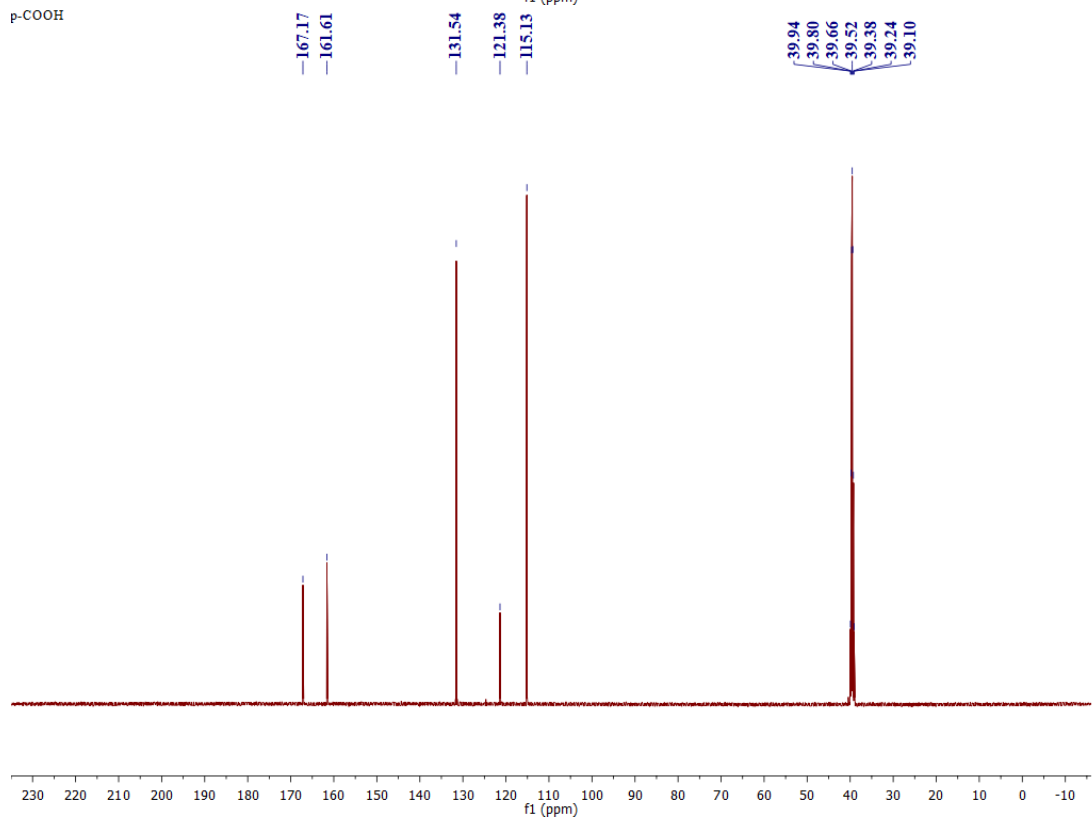

Table S1 Comparison of the catalyst with typical Cu(I) salts

| Entry | Catalyst                | Ligand                             | Loading    | Temperature | Condition                                             | Reference |
|-------|-------------------------|------------------------------------|------------|-------------|-------------------------------------------------------|-----------|
| 1     | CuI                     | 50 mol% 1,3-diketone               | 10 mol%    | 110-130°C   | Under N <sub>2</sub>                                  | [S1]      |
| 2     | CuI                     | 20 mol% 1,10-phenanthroline        | 10 mol%    | 100 °C      | Under N <sub>2</sub>                                  | [S2]      |
| 3     | CuI                     | 20 mol% lithium pipercolinate      | 10 mol%    | 130 °C      | 20 mol% (n-Bu) <sub>4</sub> NF, in air                | [S3]      |
| 4     | CuI                     | 40 mol% 8-hydroxyquinoline-N-oxide | 10 mol%    | 110-130°C   | Under Ar                                              | [S4]      |
| 5     | CuI                     | 20 mol% 8-Hydroxyquinoline         | 20 mol%    | 100 °C      | t-BuOH, under Ar                                      | [S5]      |
| 6     | Cu <sub>2</sub> O       | 10 mol% pyridine-2-aldoxime        | 5 mol%     | 100-110°C   | 20 mol% (n-Bu) <sub>4</sub> NBr, under N <sub>2</sub> | [S6]      |
| 7     | CuI                     | 20 mol% 8-hydroxyquinoline         | 10 mol%    | 100 °C      | 300 mol % n-Bu <sub>4</sub> NOH·5H <sub>2</sub> O     | [S7]      |
| 8     | Cu-ZnO-ZrO <sub>2</sub> | No                                 | 1.24 mol % | 110°C       | Under air                                             | This work |

## References

1. A. Tlili, N. Xia, F. Monnier and M. Taillefer, *Angew. Chem., Int. Ed.*, 2009, **48**, 8725–8728.
2. D. B. Zhao, N. J. Wu, S. Zhang, P. H. Xi, X. Y. Su, J. B. Lan and J. S. You, *Angew. Chem., Int. Ed.*, 2009, **48**, 8729–8732.
3. L. H. Jing, J. T. Wei, L. Zhou, Z. Y. Huang, Z. K. Li and X. G. Zhou, *Chem. Commun.*, 2010, **46**, 4767–4769.
4. K. Yang, Z. Li, Z. Y. Wang, Z. Y. Yao and S. Jiang, *Org. Lett.*, 2011, **13**, 4340–4343.
5. S. Maurer, W. Liu, X. Zhang, Y. W. Jiang and D. W. Ma, *Synlett*, 2010, 976–978.
6. D. Yang and H. Fu, *Chem. – Eur. J.*, 2010, **16**, 2366–2370.
7. R. Paul, M. A. Ali and T. Punniyamurthy, *Synthesis*, 2010, 4268–4272.
